# Supplementary material for: Comprehensive Metabolic and Taxonomic Reconstruction of an Ancient Microbial Mat From the McMurdo Ice Shelf (Antarctica) by Integrating Genetic, Metaproteomic and Lipid Biomarker Analyses
Source: Frontiers journal article supplement (doi:10.3389/fmicb.2022.799360), 2022-04-12
Supplement: Table_1.XLS [file Table_1.XLS]

## Sheet: Table 1. List of proteins
Supplementary Table 1. List of proteins identified in the Bratina microbial mat (orange) and the negative control (blue). The lastest column indicates the proteins removed from the mat sample for downstream analyses (more information in the Materials and methods section)
Accession number (UniProt)	Protein	Source organism							MW [kDa]	FDR (%)	Microbial mat			Negative control			Removed from the microbial mat sample in downstream analyses
		Domain	Phylum	Class	Order	Family	Genus	Species			No. Peptides	Sequence coverage (%)	PSMs	No. Peptides	Sequence coverage (%)	PSMs
A1SHJ1	ATP synthase subunit beta	Bacteria	Actinobacteria	Actinobacteria	Propionibacteriales	Nocardioidaceae	Nocardioides	Nocardioides sp. (ATCC BAA-499 / JS614)	52.6	<1%	4	10	4
P72232	30S ribosomal protein S10	Bacteria	Actinobacteria	Actinobacteria	Streptosporangiales	Streptosporangiaceae	Planobispora	Planobispora rosea	11.5	<1%	1	10	2
A1SMW2	10 kDa chaperonin	Bacteria	Actinobacteria	Actinobacteria	Propionibacteriales	Nocardioidaceae	Nocardioides	Nocardioides sp. (ATCC BAA-499 / JS614)	10.4	<1%	1	10	1
A1SNN5	Elongation factor Tu	Bacteria	Actinobacteria	Actinobacteria	Propionibacteriales	Nocardioidaceae	Nocardioides	Nocardioides sp. (ATCC BAA-499 / JS614)	43.8	<1%	3	9	4
A1SLR0	30S ribosomal protein S2	Bacteria	Actinobacteria	Actinobacteria	Propionibacteriales	Nocardioidaceae	Nocardioides	Nocardioides sp. (ATCC BAA-499 / JS614)	33.3	<1%	3	8	3
A1SNN7	30S ribosomal protein S7	Bacteria	Actinobacteria	Actinobacteria	Propionibacteriales	Nocardioidaceae	Nocardioides	Nocardioides sp. (ATCC BAA-499 / JS614)	17.4	<1%	1	8	1
A4X4H5	30S ribosomal protein S16	Bacteria	Actinobacteria	Actinobacteria	Micromonosporales	Micromonosporaceae	Salinispora	Salinispora tropica	16.7	<1%	1	7	1
Q1AXU6	60 kDa chaperonin	Bacteria	Actinobacteria	Rubrobacteria	Rubrobacterales	Rubrobacteraceae	Rubrobacter	Rubrobacter xylanophilus	57.5	<1%	5	6	10
A1SNU4	60 kDa chaperonin 2	Bacteria	Actinobacteria	Actinobacteria	Propionibacteriales	Nocardioidaceae	Nocardioides	Nocardioides sp. (ATCC BAA-499 / JS614)	56.8	<1%	4	6	6
A1SNI8	DNA-directed RNA polymerase subunit alpha	Bacteria	Actinobacteria	Actinobacteria	Propionibacteriales	Nocardioidaceae	Nocardioides	Nocardioides sp. (ATCC BAA-499 / JS614)	36.8	<1%	2	6	4
O33594	Elongation factor Tu	Bacteria	Actinobacteria	Actinobacteria	Streptomycetales	Streptomycetaceae	Kitasatospora	Kitasatospora aureofaciens	43.5	<1%	2	6	3
A4XBN4	50S ribosomal protein L5	Bacteria	Actinobacteria	Actinobacteria	Micromonosporales	Micromonosporaceae	Salinispora	Salinispora tropica	21.4	<1%	1	6	2
B0RB53	50S ribosomal protein L6	Bacteria	Actinobacteria	Actinobacteria	Micrococcales	Microbacteriaceae	Clavibacter	Clavibacter michiganensis	19	<1%	1	6	1
Q2JFH8	Elongation factor Tu	Bacteria	Actinobacteria	Actinobacteria	Frankiales	Frankiaceae	Frankia	Frankia casuarinae (DSM 45818 / CECT 9043 / CcI3)	43.9	<1%	2	5	4
A8LYN0	60 kDa chaperonin 1	Bacteria	Actinobacteria	Actinobacteria	Micromonosporales	Micromonosporaceae	Salinispora	Salinispora arenicola	56.8	<1%	3	4	5
A1SMW1	60 kDa chaperonin 1	Bacteria	Actinobacteria	Actinobacteria	Propionibacteriales	Nocardioidaceae	Nocardioides	Nocardioides sp. (ATCC BAA-499 / JS614)	57.3	<1%	2	4	3
C5BZB0	60 kDa chaperonin	Bacteria	Actinobacteria	Actinobacteria	Micrococcales	Beutenbergiaceae	Beutenbergia	Beutenbergia cavernae	56.4	<1%	2	4	3
Q8FT48	S-adenosylmethionine synthase	Bacteria	Actinobacteria	Actinobacteria	Corynebacteriales	Corynebacteriaceae	Corynebacterium	Corynebacterium efficiens	43.9	<1%	1	4	2
P9WKI0	Inositol-3-phosphate synthase	Bacteria	Actinobacteria	Actinobacteria	Corynebacteriales	Mycobacteriaceae	Mycobacterium	Mycobacterium tuberculosis	40	<1%	1	3	1
Q6A6L7	Elongation factor Tu	Bacteria	Actinobacteria	Actinobacteria	Propionibacteriales	Propionibacteriaceae	Cutibacterium	Cutibacterium acnes	44.1	<1%	1	3	1
A4XBP0	30S ribosomal protein S3	Bacteria	Actinobacteria	Actinobacteria	Micromonosporales	Micromonosporaceae	Salinispora	Salinispora tropica	31.6	<1%	1	3	1
A1SEK2	DNA-directed RNA polymerase subunit beta'	Bacteria	Actinobacteria	Actinobacteria	Propionibacteriales	Nocardioidaceae	Nocardioides	Nocardioides sp. (ATCC BAA-499 / JS614)	143.4	<1%	3	2	3
P40171	60 kDa chaperonin 1	Bacteria	Actinobacteria	Actinobacteria	Streptomycetales	Streptomycetaceae	Streptomyces	Streptomyces coelicolor	57.1	<1%	2	2	3
Q00767	60 kDa chaperonin 1	Bacteria	Actinobacteria	Actinobacteria	Streptomycetales	Streptomycetaceae	Streptomyces	Streptomyces albus	56.7	<1%	2	2	3
A9WMA0	60 kDa chaperonin 1	Bacteria	Actinobacteria	Actinobacteria	Micrococcales	Micrococcaceae	Renibacterium	Renibacterium salmoninarum	56.9	<1%	1	2	2
Q6A6K7	DNA-directed RNA polymerase subunit beta'	Bacteria	Actinobacteria	Actinobacteria	Propionibacteriales	Propionibacteriaceae	Cutibacterium	Cutibacterium acnes	143.4	<1%	2	2	2
C5CC70	DNA-directed RNA polymerase subunit beta'	Bacteria	Actinobacteria	Actinobacteria	Micrococcales	Micrococcaceae	Micrococcus	Micrococcus luteus	142.3	<1%	2	2	2
B2HEP6	Adenosylhomocysteinase	Bacteria	Actinobacteria	Actinobacteria	Corynebacteriales	Mycobacteriaceae	Mycobacterium	Mycobacterium marinum	53.9	<1%	1	2	1
A1SLJ4	Polyribonucleotide nucleotidyltransferase	Bacteria	Actinobacteria	Actinobacteria	Propionibacteriales	Nocardioidaceae	Nocardioides	Nocardioides sp. (ATCC BAA-499 / JS614)	79.7	<1%	1	2	1
A4FN29	ATP synthase subunit alpha	Bacteria	Actinobacteria	Actinobacteria	Pseudonocardiales	Pseudonocardiaceae	Saccharopolyspora	Saccharopolyspora erythraea	59	<1%	1	2	1
A1A3C7	ATP synthase subunit alpha	Bacteria	Actinobacteria	Actinobacteria	Bifidobacteriales	Bifidobacteriaceae	Bifidobacterium	Bifidobacterium adolescentis	58.6	<1%	1	2	1
A6WFV7	Chaperone protein DnaK	Bacteria	Actinobacteria	Actinobacteria	Kineosporiales	Kineosporiaceae	Kineococcus	Kineococcus radiotolerans	66.4	<1%	1	2	1
Q50388	DNA-directed RNA polymerase subunit beta	Bacteria	Actinobacteria	Actinobacteria	Corynebacteriales	Mycobacteriaceae	Mycolicibacterium	Mycolicibacterium smegmatis	128.9	<1%	1	1	1
Q49689	UPF0051 protein ML0593	Bacteria	Actinobacteria	Actinobacteria	Corynebacteriales	Mycobacteriaceae	Mycobacterium	Mycobacterium leprae	95.5	<1%	1	1	1
P0A4G6	Protein translocase subunit SecA	Bacteria	Actinobacteria	Actinobacteria	Streptomycetales	Streptomycetaceae	Streptomyces	Streptomyces coelicolor	106.4	<1%	1	1	1
Q8I1F4	rRNA 2'-O-methyltransferase fibrillarin	Eukarya	Arthropoda	Insecta	Diptera	Drosophilidae	Drosophila	Drosophila erecta	34.7	<1%	1	5	2
P31816	Tropomyosin	Eukarya	Arthropoda	Insecta	Orthoptera	Acrididae	Locusta	Locusta migratoria	32.4	<1%	1	5	1
Q5B2V1	Heat shock 70 kDa protein	Eukarya	Ascomycota	Eurotiomycetes	Eurotiales	Aspergillaceae	Aspergillus	Emericella nidulans	69.9	<1%	1	2	1
A0T0L9	Photosystem I P700 chlorophyll a apoprotein A1	Eukarya	Bacillariophyta (diatoms)	Bacillariophyceae (Raphid, pennate diatoms)	Naviculales	Phaeodactylaceae	Phaeodactylum	Phaeodactylum tricornutum	83.5	<1%	1	1	1
Q8A1G1	TonB-dependent receptor SusC	Bacteria	Bacteroidetes	Bacteroidia	Bacteroidales	Bacteroidaceae	Bacteroides	Bacteroides thetaiotaomicron	111.1	<1%	1	1	3
Q5L5I4	DNA-directed RNA polymerase subunit beta'	Bacteria	Chlamydiae	Chlamydiia	Chlamydiales	Chlamydiaceae	Chlamydia	Chlamydia abortus	154.9	<1%	2	1	2
Q8KA87	Probable chaperone protein ClpB 2	Bacteria	Chlorobi	Chlorobia	Chlorobiales	Chlorobiaceae	Chlorobaculum	Chlorobaculum tepidum	48.9	<1%	1	2	1
P56342	Photosystem I P700 chlorophyll a apoprotein A2	Eukarya	Chlorophyta	Trebouxiophyceae	Chlorellales	Chlorellaceae	Chlorella	Chlorella vulgaris	81.8	<1%	3	5	7
P27517	Chlorophyll a-b binding protein of LHCII type I, chloroplastic	Eukarya	Chlorophyta	Chlorophyceae	Chlamydomonadales	Dunaliellaceae	Dunaliella	Dunaliella tertiolecta	27.2	<1%	1	4	4
Q9TKW4	Photosystem II CP47 reaction center protein	Eukarya	Chlorophyta	Nephroselmidophyceae			Nephroselmis	Nephroselmis olivacea	56	<1%	1	2	3
Q0P3K1	Photosystem I P700 chlorophyll a apoprotein A1	Eukarya	Chlorophyta	Mamiellophyceae	Mamiellales	Bathycoccaceae	Ostreococcus	Ostreococcus tauri	83.1	<1%	1	1	1
Q20EW6	Photosystem I P700 chlorophyll a apoprotein A1	Eukarya	Chlorophyta	Ulvophyceae			Oltmannsiellopsis	Oltmannsiellopsis viridis	83.1	<1%	1	1	1
P06702	Protein S100-A9	Eukarya	Chordata	Mammalia	Primates	Hominidae	Homo	Homo sapiens	13.2	<1%	3	32	4				X
P31151	Protein S100-A7	Eukarya	Chordata	Mammalia	Primates	Hominidae	Homo	Homo sapiens	11.5	<1%	2	24	2				X
O95969	Secretoglobin family 1D member 2	Eukarya	Chordata	Mammalia	Primates	Hominidae	Homo	Homo sapiens	9.9	<1%	2	22	3				X
P31944	Caspase-14	Eukarya	Chordata	Mammalia	Primates	Hominidae	Homo	Homo sapiens	27.7	<1%	4	19	5				X
P04406	Glyceraldehyde-3-phosphate dehydrogenase	Eukarya	Chordata	Mammalia	Primates	Hominidae	Homo	Homo sapiens	36	<1%	3	14	3				X
O14633	Late cornified envelope protein 2B	Eukarya	Chordata	Mammalia	Primates	Hominidae	Homo	Homo sapiens	11.2	<1%	1	14	2				X
P25815	Protein S100-P	Eukarya	Chordata	Mammalia	Primates	Hominidae	Homo	Homo sapiens	10.4	<1%	1	14	1				X
Q6UWP8	Suprabasin	Eukarya	Chordata	Mammalia	Primates	Hominidae	Homo	Homo sapiens	60.5	<1%	2	11	3				X
P01614	Immunoglobulin kappa variable 2D-40	Eukarya	Chordata	Mammalia	Primates	Hominidae	Homo	Homo sapiens	13.3	<1%	1	11	1				X
P01973	Hemoglobin subunit alpha	Eukarya	Chordata	Mammalia	Artiodactyla	Camelidae	Lama	Lama glama	15.1	<1%	1	11	1				X
Q9H1E1	Ribonuclease 7	Eukarya	Chordata	Mammalia	Primates	Hominidae	Homo	Homo sapiens	17.4	<1%	1	10	3				X
P01833	Polymeric immunoglobulin receptor	Eukarya	Chordata	Mammalia	Primates	Hominidae	Homo	Homo sapiens	83.2	<1%	4	9	4				X
P02067	Hemoglobin subunit beta	Eukarya	Chordata	Mammalia	Artiodactyla	Suidae	Sus	Sus scrofa	16.2	<1%	1	9	1				X
P01763	Immunoglobulin heavy variable 3-48	Eukarya	Chordata	Mammalia	Primates	Hominidae	Homo	Homo sapiens	12.8	<1%	1	9	1				X
P47929	Galectin-7	Eukarya	Chordata	Mammalia	Primates	Hominidae	Homo	Homo sapiens	15.1	<1%	1	8	1				X
P01861	Ig gamma-4 chain C region	Eukarya	Chordata	Mammalia	Primates	Hominidae	Homo	Homo sapiens	35.9	<1%	2	7	4				X
P07339	Cathepsin D	Eukarya	Chordata	Mammalia	Primates	Hominidae	Homo	Homo sapiens	44.5	<1%	2	6	4				X
P31025	Lipocalin-1	Eukarya	Chordata	Mammalia	Primates	Hominidae	Homo	Homo sapiens	19.2	<1%	1	6	2				X
Q9UI42	Carboxypeptidase A4	Eukarya	Chordata	Mammalia	Primates	Hominidae	Homo	Homo sapiens	47.3	<1%	2	6	2				X
Q6B4U9	Peroxiredoxin-1	Eukarya	Chordata	Mammalia	Chiroptera	Vespertilionidae	Myotis	Myotis lucifugus	22.1	<1%	1	6	2				X
P49862	Kallikrein-7	Eukarya	Chordata	Mammalia	Primates	Hominidae	Homo	Homo sapiens	27.5	<1%	1	6	1				X
Q8BFZ3	Beta-actin-like protein 2	Eukarya	Chordata	Mammalia	Rodentia	Muridae	Mus	Mus musculus	42	<1%	1	5	1				X
A3KN27	Keratin, type II cytoskeletal 74	Eukarya	Chordata	Mammalia	Artiodactyla	Bovidae	Bos	Bos taurus	59.9	<1%	2	4	23				X
Q5T749	Keratinocyte proline-rich protein	Eukarya	Chordata	Mammalia	Primates	Hominidae	Homo	Homo sapiens	64.1	<1%	2	4	3				X
Q96DA0	Zymogen granule protein 16 homolog B	Eukarya	Chordata	Mammalia	Primates	Hominidae	Homo	Homo sapiens	22.7	<1%	1	4	1				X
P08246	Neutrophil elastase	Eukarya	Chordata	Mammalia	Primates	Hominidae	Homo	Homo sapiens	28.5	<1%	1	4	1				X
P54108	Cysteine-rich secretory protein 3	Eukarya	Chordata	Mammalia	Primates	Hominidae	Homo	Homo sapiens	27.6	<1%	1	4	1				X
P01871	Ig mu chain C region	Eukarya	Chordata	Mammalia	Primates	Hominidae	Homo	Homo sapiens	49.3	<1%	1	4	1				X
P28072	Proteasome subunit beta type-6	Eukarya	Chordata	Mammalia	Primates	Hominidae	Homo	Homo sapiens	25.3	<1%	1	4	1				X
O95274	Ly6/PLAUR domain-containing protein 3	Eukarya	Chordata	Mammalia	Primates	Hominidae	Homo	Homo sapiens	35.9	<1%	1	3	1				X
P11279	Lysosome-associated membrane glycoprotein 1	Eukarya	Chordata	Mammalia	Primates	Hominidae	Homo	Homo sapiens	44.9	<1%	1	3	1				X
Q4R4J2	Coronin-1A	Eukarya	Chordata	Mammalia	Primates	Cercopithecidae	Macaca	Macaca fascicularis	50.9	<1%	1	3	1				X
P49410	Elongation factor Tu, mitochondrial	Eukarya	Chordata	Mammalia	Artiodactyla	Bovidae	Bos	Bos taurus	49.4	<1%	1	2	2				X
Q6IFX1	Keratin, type I cytoskeletal 24	Eukarya	Chordata	Mammalia	Rodentia	Muridae	Rattus	Rattus norvegicus	52.3	<1%	1	2	1				X
P01009	Alpha-1-antitrypsin	Eukarya	Chordata	Mammalia	Primates	Hominidae	Homo	Homo sapiens	46.7	<1%	1	2	1				X
Q6P4A8	Phospholipase B-like 1	Eukarya	Chordata	Mammalia	Primates	Hominidae	Homo	Homo sapiens	63.2	<1%	1	2	1				X
Q5RBB5	Protein POF1B	Eukarya	Chordata	Mammalia	Primates	Hominidae	Pongo	Pongo abelii	67.9	<1%	1	2	1				X
P05164	Myeloperoxidase	Eukarya	Chordata	Mammalia	Primates	Hominidae	Homo	Homo sapiens	83.8	<1%	1	1	1				X
Q14574	Desmocollin-3	Eukarya	Chordata	Mammalia	Primates	Hominidae	Homo	Homo sapiens	99.9	<1%	1	1	1				X
P07060	Gas vesicle structural protein	Bacteria	Cyanobacteria		Nostocales	Rivulariaceae	Microchaete	Microchaete diplosiphon	7.5	<1%	1	20	1
P0A408	Photosystem I P700 chlorophyll a apoprotein A2	Bacteria	Cyanobacteria		Synechococcales	Synechococcaceae	Synechococcus	Synechococcus elongatus	83	<1%	7	11	13
P58565	Photosystem I P700 chlorophyll a apoprotein A2 1	Bacteria	Cyanobacteria		Nostocales	Nostocaceae	Nostoc	Nostoc sp. (PCC 7120 / SAG 25.82 / UTEX 2576)	83.3	<1%	7	10	44
Q31LJ1	Photosystem I P700 chlorophyll a apoprotein A2	Bacteria	Cyanobacteria		Synechococcales	Synechococcaceae	Synechococcus	Synechococcus elongatus	81.4	<1%	7	10	22
P29254	Photosystem I P700 chlorophyll a apoprotein A1	Bacteria	Cyanobacteria		Synechococcales	Merismopediaceae	Synechocystis	Synechocystis sp. PCC 6803	82.9	<1%	5	7	8
P0A402	Photosystem I reaction center subunit III	Bacteria	Cyanobacteria		Synechococcales	Synechococcaceae	Synechococcus	Synechococcus elongatus	17.7	<1%	1	7	2
P07325	Allophycocyanin alpha chain	Bacteria	Cyanobacteria		Nostocales	Nostocaceae	Anabaena	Anabaena cylindrica	17.1	<1%	1	6	1
Q3AMS4	Photosystem I P700 chlorophyll a apoprotein A2	Bacteria	Cyanobacteria		Synechococcales	Synechococcaceae	Synechococcus	Synechococcus sp.CC9605	81.8	<1%	3	5	7
P31094	Photosystem II CP47 reaction center protein	Bacteria	Cyanobacteria		Synechococcales	Synechococcaceae	Synechococcus	Synechococcus elongatus	55.7	<1%	2	4	4
Q2JRU9	Photosystem I P700 chlorophyll a apoprotein A2	Bacteria	Cyanobacteria		Synechococcales	Synechococcaceae	Synechococcus	Synechococcus sp. A-3-3Ab	82.8	<1%	2	3	6
Q3M9W0	ATP synthase subunit alpha	Bacteria	Cyanobacteria		Nostocales	Nostocaceae	Trichormus	Anabaena variabilis	54.4	<1%	1	3	4
Q318M0	Photosystem I P700 chlorophyll a apoprotein A2	Bacteria	Cyanobacteria		Synechococcales	Prochloraceae	Prochlorococcus	Prochlorococcus marinus	82.8	<1%	2	3	3
B8HLB2	Photosystem I P700 chlorophyll a apoprotein A1	Bacteria	Cyanobacteria		Oscillatoriales	Cyanothecaceae	Cyanothece	Cyanothece sp. (PCC 7425 / ATCC 29141)	83.5	<1%	2	3	2
Q8YNL5	Uncharacterized protein alr4550	Bacteria	Cyanobacteria		Nostocales	Nostocaceae	Nostoc	Nostoc sp. (PCC 7120 / SAG 25.82 / UTEX 2576)	60.5	<1%	1	2	5
P58576	Photosystem I P700 chlorophyll a apoprotein A1	Bacteria	Cyanobacteria		Nostocales	Nostocaceae	Nostoc	Nostoc sp. (PCC 7120 / SAG 25.82 / UTEX 2576)	83.1	<1%	1	2	1
Q1IW59	60 kDa chaperonin	Bacteria	Deinococcus-Thermus	Deinococci	Deinococcales	Deinococcaceae	Deinococcus	Deinococcus geothermalis	57.8	<1%	3	4	7
P33168	Elongation factor Tu	Bacteria	Deinonema inc. sed.	Deinonema inc. sed.	Deinonema inc. sed.	Deinonema inc. sed.	Deinonema	Deinonema sp.	44.3	<1%	1	3	2
P22532	Small proline-rich protein 2D	Eukarya	Euglenozoa	Mammalia	Primates	Hominidae	Homo	Homo sapiens	7.9	<1%	1	18	2
B8GJQ7	F420-dependent methylenetetrahydromethanopterin dehydrogenase	Archaea	Euryarchaeota	Methanomicrobia	Methanomicrobiales	Methanoregulaceae	Methanosphaerula	Methanosphaerula palustris	30.3	<1%	1	6	1
P07964	Methyl-coenzyme M reductase subunit gamma	Archaea	Euryarchaeota	Methanomicrobia	Methanosarcinales	Methanosarcinaceae	Methanosarcina	Methanosarcina barkeri	27.8	<1%	1	4	1
Q4L7Y4	ATP synthase subunit beta	Bacteria	Firmicutes	Bacilli	Bacillales	Staphylococcaceae	Staphylococcus	Staphylococcus haemolyticus	51.5	<1%	2	6	3
A7FYP3	60 kDa chaperonin	Bacteria	Firmicutes	Clostridia	Clostridiales	Clostridiaceae	Clostridium	Clostridium botulinum	57.9	<1%	2	4	4
P29068	Carboxypeptidase T	Bacteria	Firmicutes	Bacilli	Bacillales	Thermoactinomycetaceae	Thermoactinomyces	Thermoactinomyces vulgaris	47.4	<1%	1	4	1
A8MG60	UPF0365 protein Clos_1242	Bacteria	Firmicutes	Clostridia	Clostridiales	Clostridiaceae	Alkaliphilus	Alkaliphilus oremlandii	35.5	<1%	1	3	1
P23722	Glyceraldehyde-3-phosphate dehydrogenase	Bacteria	Firmicutes	Bacilli	Bacillales	Bacillaceae	Bacillus	Bacillus megaterium	35.9	<1%	1	3	1
Q18CE4	Elongation factor Tu	Bacteria	Firmicutes	Clostridia	Clostridiales	Peptostreptococcaceae	Clostridioides	Clostridioides difficile	44	<1%	1	2	2
B8FNT7	60 kDa chaperonin	Bacteria	Firmicutes	Clostridia	Clostridiales	Peptococcaceae	Desulfitobacterium	Desulfitobacterium hafniense	57.3	<1%	2	2	2
Q3ADX3	60 kDa chaperonin	Bacteria	Firmicutes	Clostridia	Thermoanaerobacterales	Thermoanaerobacteraceae	Carboxydothermus	Carboxydothermus hydrogenoformans	57.6	<1%	1	2	2
Q8RHJ2	Putative K(+)-stimulated pyrophosphate-energized sodium pump	Bacteria	Fusobacteria	Fusobacteriia	Fusobacteriales	Fusobacteriaceae	Fusobacterium	Fusobacterium nucleatum	68.9	<1%	1	2	1
Q37757	60 kDa chaperonin, cyanelle	Eukarya	Glaucocystophyceae inc. sed.	Glaucocystophyceae	Cyanophoraceae inc. Sed.	Cyanophoraceae	Cyanophora	Cyanophora paradoxa	58.3	<1%	1	2	2
Q4G3F5	Photosystem I P700 chlorophyll a apoprotein A2	Eukarya	Haptophyta inc. sed.	Haptophyta	Isochrysidales	Noelaerhabdaceae	Emiliania	Emiliania huxleyi	82	<1%	3	5	6
Q7UFB5	ATP synthase subunit beta	Bacteria	Planctomycetes	Planctomycetia	Planctomycetales	Planctomycetaceae	Rhodopirellula	Rhodopirellula baltica	52.1	<1%	2	6	2
A1VJZ8	60 kDa chaperonin 2	Bacteria	Proteobacteria	Betaproteobacteria	Burkholderiales	Comamonadaceae	Polaromonas	Polaromonas naphthalenivorans	57.5	<1%	6	12	9
P34939	60 kDa chaperonin	Bacteria	Proteobacteria	Alphaproteobacteria	Rhizobiales	Rhizobiaceae	Rhizobium	Rhizobium leguminosarum	57.8	<1%	7	12	9
Q99QM0	Elongation factor Tu	Bacteria	Proteobacteria	Alphaproteobacteria	Caulobacterales	Caulobacteraceae	Caulobacter	Caulobacter vibrioides	43.3	<1%	4	11	5
P45689	Major carboxysome shell protein 1A	Bacteria	Proteobacteria	Gammaproteobacteria	Chromatiales	Halothiobacillaceae	Halothiobacillus	Halothiobacillus neapolitanus	10	<1%	1	11	2
A1WL05	60 kDa chaperonin	Bacteria	Proteobacteria	Betaproteobacteria	Burkholderiales	Comamonadaceae	Verminephrobacter	Verminephrobacter eiseniae	57.4	<1%	5	10	8
A7HQQ0	60 kDa chaperonin	Bacteria	Proteobacteria	Alphaproteobacteria	Rhizobiales	Rhodobiaceae	Parvibaculum	Parvibaculum lavamentivorans	58.2	<1%	5	10	6
A3QA46	60 kDa chaperonin	Bacteria	Proteobacteria	Gammaproteobacteria	Alteromonadales	Shewanellaceae	Shewanella	Shewanella loihica	57.3	<1%	4	8	7
Q0KDR7	60 kDa chaperonin	Bacteria	Proteobacteria	Betaproteobacteria	Burkholderiales	Burkholderiaceae	Cupriavidus	Cupriavidus necator	57.3	<1%	4	8	7
P26004	60 kDa chaperonin	Bacteria	Proteobacteria	Gammaproteobacteria	Legionellales	Legionellaceae	Legionella	Legionella jeonii	58.3	<1%	4	8	6
Q11LG4	60 kDa chaperonin 1	Bacteria	Proteobacteria	Alphaproteobacteria	Rhizobiales	Phyllobacteriaceae	Chelativorans	Chelativorans sp. BNC1	57.5	<1%	4	8	5
A8EW87	30S ribosomal protein S7	Bacteria	Proteobacteria	Epsilonproteobacteria	Campylobacterales	Campylobacteraceae	Arcobacter	Arcobacter butzleri	17.9	<1%	1	8	1
Q3SLQ1	Elongation factor Tu	Bacteria	Proteobacteria	Betaproteobacteria	Nitrosomonadales	Thiobacillaceae	Thiobacillus	Thiobacillus denitrificans	43.1	<1%	3	7	4
Q2K9N2	Elongation factor Tu 1	Bacteria	Proteobacteria	Alphaproteobacteria	Rhizobiales	Rhizobiaceae	Rhizobium	Rhizobium etli	42.6	<1%	2	7	2
Q3J729	60 kDa chaperonin	Bacteria	Proteobacteria	Gammaproteobacteria	Chromatiales	Chromatiaceae	Nitrosococcus	Nitrosococcus oceani	58.2	<1%	3	6	5
Q8RIT7	60 kDa chaperonin	Bacteria	Proteobacteria	Gammaproteobacteria	Xanthomonadales	Xanthomonadaceae	Xanthomonas	Xanthomonas phaseoli	57.2	<1%	3	6	5
Q2WAW8	60 kDa chaperonin	Bacteria	Proteobacteria	Alphaproteobacteria	Rhodospirillales	Rhodospirillaceae	Magnetospirillum	Magnetospirillum magneticum	57.8	<1%	3	6	4
A3PID0	60 kDa chaperonin	Bacteria	Proteobacteria	Alphaproteobacteria	Rhodobacterales	Rhodobacteraceae	Rhodobacter	Rhodobacter sphaeroides	57.9	<1%	3	6	4
A6U7N0	60 kDa chaperonin 2	Bacteria	Proteobacteria	Alphaproteobacteria	Rhizobiales	Rhizobiaceae	Sinorhizobium	Sinorhizobium medicae	58	<1%	3	6	4
Q123F6	Elongation factor Tu	Bacteria	Proteobacteria	Betaproteobacteria	Burkholderiales	Comamonadaceae	Polaromonas	Polaromonas sp. (JS666 / ATCC BAA-500)	42.9	<1%	2	6	4
Q21SF0	Elongation factor Tu 1	Bacteria	Proteobacteria	Betaproteobacteria	Burkholderiales	Comamonadaceae	Rhodoferax	Rhodoferax ferrireducens	43	<1%	2	6	3
A8LLG2	Elongation factor Tu	Bacteria	Proteobacteria	Alphaproteobacteria	Rhodobacterales	Rhodobacteraceae	Dinoroseobacter	Dinoroseobacter shibae	42.8	<1%	2	5	4
A9GBQ2	60 kDa chaperonin 2	Bacteria	Proteobacteria	Deltaproteobacteria	Myxococcales	Polyangiaceae	Sorangium	Sorangium cellulosum	58	<1%	2	5	4
A7HBL7	Elongation factor Tu	Bacteria	Proteobacteria	Deltaproteobacteria	Myxococcales	Anaeromyxobacteraceae	Anaeromyxobacter	Anaeromyxobacter sp. (Fw109-5)	43.4	<1%	2	5	3
C3K2X8	Elongation factor Tu	Bacteria	Proteobacteria	Gammaproteobacteria	Pseudomonadales	Pseudomonadaceae	Pseudomonas	Pseudomonas fluorescens	43.5	<1%	2	5	3
A1T056	Elongation factor Tu	Bacteria	Proteobacteria	Gammaproteobacteria	Alteromonadales	Psychromonadaceae	Psychromonas	Psychromonas ingrahamii	43.2	<1%	2	5	3
Q057A2	Elongation factor Tu	Bacteria	Proteobacteria	Gammaproteobacteria	Enterobacterales	Erwiniaceae	Buchnera	Buchnera aphidicola	43.5	<1%	2	5	3
C5CKF0	50S ribosomal protein L1	Bacteria	Proteobacteria	Betaproteobacteria	Burkholderiales	Comamonadaceae	Variovorax	Variovorax paradoxus	23.9	<1%	1	5	1
A8IPQ8	Peptide methionine sulfoxide reductase MsrA	Bacteria	Proteobacteria	Alphaproteobacteria	Rhizobiales	Xanthobacteraceae	Azorhizobium	Azorhizobium caulinodans	23.5	<1%	1	5	1
Q1R0I5	50S ribosomal protein L1	Bacteria	Proteobacteria	Gammaproteobacteria	Oceanospirillales	Halomonadaceae	Chromohalobacter	Chromohalobacter salexigens	24.2	<1%	1	5	1
Q0B1N7	60 kDa chaperonin 3	Bacteria	Proteobacteria	Betaproteobacteria	Burkholderiales	Burkholderiaceae	Burkholderia	Burkholderia ambifaria	57	<1%	2	4	4
A1AST1	60 kDa chaperonin	Bacteria	Proteobacteria	Deltaproteobacteria	Desulfuromonadales	Desulfuromonadaceae	Pelobacter	Pelobacter propionicus	58.8	<1%	2	4	4
A1WZJ2	60 kDa chaperonin	Bacteria	Proteobacteria	Gammaproteobacteria	Chromatiales	Ectothiorhodospiraceae	Halorhodospira	Halorhodospira halophila	57.8	<1%	2	4	4
C3K1A0	60 kDa chaperonin	Bacteria	Proteobacteria	Gammaproteobacteria	Pseudomonadales	Pseudomonadaceae	Pseudomonas	Pseudomonas fluorescens	56.9	<1%	2	4	3
Q4K764	60 kDa chaperonin	Bacteria	Proteobacteria	Gammaproteobacteria	Pseudomonadales	Pseudomonadaceae	Pseudomonas	Pseudomonas protegens	57	<1%	2	4	3
Q2N5R9	60 kDa chaperonin 2	Bacteria	Proteobacteria	Alphaproteobacteria	Sphingomonadales	Erythrobacteraceae	Erythrobacter	Erythrobacter litoralis	58.2	<1%	2	4	3
A9HPH6	60 kDa chaperonin 2	Bacteria	Proteobacteria	Alphaproteobacteria	Rhodospirillales	Acetobacteraceae	Gluconacetobacter	Gluconacetobacter diazotrophicus	57.3	<1%	3	4	3
Q74D53	Malate dehydrogenase	Bacteria	Proteobacteria	Deltaproteobacteria	Desulfuromonadales	Geobacteraceae	Geobacter	Geobacter sulfurreducens	33.7	<1%	1	4	1
Q5P6B7	Adenosylhomocysteinase	Bacteria	Proteobacteria	Betaproteobacteria	Rhodocyclales	Rhodocyclaceae	Aromatoleum	Aromatoleum aromaticum	51.7	<1%	1	3	3
Q6AP73	Elongation factor Tu 2	Bacteria	Proteobacteria	Deltaproteobacteria	Desulfobacterales	Desulfobulbaceae	Desulfotalea	Desulfotalea psychrophila	43.3	<1%	1	3	2
Q04508	Ammonia monooxygenase	Bacteria	Proteobacteria	Betaproteobacteria	Nitrosomonadales	Nitrosomonadaceae	Nitrosomonas	Nitrosomonas europaea	46.8	<1%	1	3	2
Q5X873	Elongation factor Tu	Bacteria	Proteobacteria	Gammaproteobacteria	Legionellales	Legionellaceae	Legionella	Legionella pneumophila	43.2	<1%	1	3	2
A1TJ05	Elongation factor Tu	Bacteria	Proteobacteria	Betaproteobacteria	Burkholderiales	Comamonadaceae	Acidovorax	Acidovorax citrulli	43.1	<1%	1	3	2
Q8PP84	Adenosylhomocysteinase	Bacteria	Proteobacteria	Gammaproteobacteria	Xanthomonadales	Xanthomonadaceae	Xanthomonas	Xanthomonas citri	52.8	<1%	1	3	2
P24305	Outer membrane porin protein 32	Bacteria	Proteobacteria	Betaproteobacteria	Burkholderiales	Comamonadaceae	Delftia	Delftia acidovorans	36.6	<1%	1	3	2
Q6G584	Adenosylhomocysteinase	Bacteria	Proteobacteria	Alphaproteobacteria	Rhizobiales	Bartonellaceae	Bartonella	Bartonella henselae	51	<1%	1	3	1
A4Y187	ATP synthase subunit beta	Bacteria	Proteobacteria	Gammaproteobacteria	Pseudomonadales	Pseudomonadaceae	Pseudomonas	Pseudomonas mendocina	49.6	<1%	1	3	1
Q2G623	Ketol-acid reductoisomerase (NADP(+))	Bacteria	Proteobacteria	Alphaproteobacteria	Sphingomonadales	Sphingomonadaceae	Novosphingobium	Novosphingobium aromaticivorans	36.5	<1%	1	3	1
P52155	Transcription termination factor Rho	Bacteria	Proteobacteria	Gammaproteobacteria	Pseudomonadales	Pseudomonadaceae	Pseudomonas	Pseudomonas fluorescens	46.9	<1%	1	3	1
Q1D2S1	60 kDa chaperonin 2	Bacteria	Proteobacteria	Deltaproteobacteria	Myxococcales	Myxococcaceae	Myxococcus	Myxococcus xanthus	57.9	<1%	1	2	1
Q6ARV6	60 kDa chaperonin	Bacteria	Proteobacteria	Deltaproteobacteria	Desulfobacterales	Desulfobulbaceae	Desulfotalea	Desulfotalea psychrophila	55.6	<1%	1	2	1
B8FM86	60 kDa chaperonin	Bacteria	Proteobacteria	Deltaproteobacteria	Desulfobacterales	Desulfobacteraceae	Desulfatibacillum	Desulfatibacillum aliphaticivorans	58	<1%	1	2	1
Q6MRI1	60 kDa chaperonin	Bacteria	Proteobacteria	Oligoflexia	Bdellovibrionales	Bdellovibrionaceae	Bdellovibrio	Bdellovibrio bacteriovorus	58.1	<1%	1	2	1
Q82TF3	K(+)-insensitive pyrophosphate-energized proton pump	Bacteria	Proteobacteria	Betaproteobacteria	Nitrosomonadales	Nitrosomonadaceae	Nitrosomonas	Nitrosomonas europaea	70	<1%	1	2	1
Q8DEV2	Chaperone protein ClpB	Bacteria	Proteobacteria	Gammaproteobacteria	Vibrionales	Vibrionaceae	Vibrio	Vibrio vulnificus	96	<1%	1	2	1
Q1H0J2	Acetyl-coenzyme A synthetase	Bacteria	Proteobacteria	Betaproteobacteria	Nitrosomonadales	Methylophilaceae	Methylobacillus	Methylobacillus flagellatus	72.1	<1%	1	2	1
A1B5P9	Polyribonucleotide nucleotidyltransferase	Bacteria	Proteobacteria	Alphaproteobacteria	Rhodobacterales	Rhodobacteraceae	Paracoccus	Paracoccus denitrificans	77.4	<1%	1	2	1
Q9X576	Catalase C	Bacteria	Proteobacteria	Alphaproteobacteria	Rhizobiales	Rhizobiaceae	Sinorhizobium	Rhizobium meliloti	78.6	<1%	1	2	1
P21179	Catalase HPII	Bacteria	Proteobacteria	Gammaproteobacteria	Enterobacterales	Enterobacteriaceae	Escherichia	Escherichia coli	84.1	<1%	1	1	3
Q9I3F5	Aconitate hydratase A	Bacteria	Proteobacteria	Gammaproteobacteria	Pseudomonadales	Pseudomonadaceae	Pseudomonas	Pseudomonas aeruginosa	99.1	<1%	1	1	1
Q4ZMP1	Elongation factor G	Bacteria	Proteobacteria	Gammaproteobacteria	Pseudomonadales	Pseudomonadaceae	Pseudomonas	Pseudomonas syringae	77.1	<1%	1	1	1
P80776	33 kDa cell wall protein (Fragment)	Eukarya	Streptophyta		Fabales	Fabaceae	Phaseolus	Phaseolus vulgaris	1.5	<1%	1	80	1				X
B2UKV8	60 kDa chaperonin	Bacteria	Verrucomicrobia	Verrucomicrobiae	Verrucomicrobiales	Akkermansiaceae	Akkermansia	Akkermansia muciniphila	58.4	<1%	1	3	2
P35908	Keratin, type II cytoskeletal 2 epidermal	Eukarya	Chordata	Mammalia	Primates	Hominidae	Homo	Homo sapiens	65.4	<1%	44	67	664	31	61	292	X
P04264	Keratin, type II cytoskeletal 1	Eukarya	Chordata	Mammalia	Primates	Hominidae	Homo	Homo sapiens	66	<1%	44	52	812	29	43	348	X
P35527	Keratin, type I cytoskeletal 9	Eukarya	Chordata	Mammalia	Primates	Hominidae	Homo	Homo sapiens	62	<1%	27	58	303	20	36	169	X
Q6EIZ0	Keratin, type I cytoskeletal 10	Eukarya	Chordata	Mammalia	Carnivora	Canidae	Canis	Canis lupus	57.7	<1%	18	26	462	14	21	168	X
Q6EIY9	Keratin, type II cytoskeletal 1	Eukarya	Chordata	Mammalia	Carnivora	Canidae	Canis	Canis lupus	63.8	<1%	16	16	327	10	15	121	X
P06394	Keratin, type I cytoskeletal 10	Eukarya	Chordata	Mammalia	Artiodactyla	Bovidae	Bos	Bos taurus	54.8	<1%	11	15	272	9	13	48	X
Q08D91	Keratin, type II cytoskeletal 75	Eukarya	Chordata	Mammalia	Artiodactyla	Bovidae	Bos	Bos taurus	59	<1%	12	16	180	5	9	51	X
P41341	Actin-11	Eukarya	Arthropoda	Merostomata	Xiphosura	Limulidae	Limulus	Limulus polyphemus	41.8	<1%	4	12	9	4	12	5	X
P10365	Actin	Eukarya	Ascomycota	Eurotiomycetes	Eurotiales	Trichocomaceae	Thermomyces	Thermomyces lanuginosus	41.6	<1%	4	12	9	4	12	5	X
O93532	Keratin, type II cytoskeletal cochleal	Eukarya	Chordata	Aves	Galliformes	Phasianidae	Gallus	Gallus gallus	53.8	<1%	7	14	194	4	8	45	X
Q54GX7	Actin-10	Eukarya	Amoebozoa	Eumycetozoa	Dictyosteliales	Dictyosteliaceae	Dictyostelium	Dictyostelium discoideum	41.7	<1%	3	8	8	3	8	4	X
P12273	Prolactin-inducible protein	Eukarya	Chordata	Mammalia	Primates	Hominidae	Homo	Homo sapiens	16.6	<1%	5	34	59	3	23	13	X
P25311	Zinc-alpha-2-glycoprotein	Eukarya	Chordata	Mammalia	Primates	Hominidae	Homo	Homo sapiens	34.2	<1%	7	28	9	3	13	6	X
Q01469	Fatty acid-binding protein, epidermal	Eukarya	Chordata	Mammalia	Primates	Hominidae	Homo	Homo sapiens	15.2	<1%	3	25	4	3	21	4	X
P79239	Lysozyme C	Eukarya	Chordata	Mammalia	Primates	Hominidae	Pongo	Pongo pygmaeus	16.6	<1%	3	22	19	3	19	4	X
P01876	Ig alpha-1 chain C region	Eukarya	Chordata	Mammalia	Primates	Hominidae	Homo	Homo sapiens	37.6	<1%	5	16	8	3	8	8	X
Q6TEQ7	Annexin A2	Eukarya	Chordata	Mammalia	Carnivora	Canidae	Canis	Canis lupus	38.6	<1%	5	15	6	3	9	4	X
O75223	Gamma-glutamylcyclotransferase	Eukarya	Chordata	Mammalia	Primates	Hominidae	Homo	Homo sapiens	21	<1%	2	12	2	3	17	4	X
Q08554	Desmocollin-1	Eukarya	Chordata	Mammalia	Primates	Hominidae	Homo	Homo sapiens	99.9	<1%	9	11	17	3	5	4	X
P04279	Semenogelin-1	Eukarya	Chordata	Mammalia	Primates	Hominidae	Homo	Homo sapiens	52.1	<1%	3	9	4	3	10	5	X
Q08188	Protein-glutamine gamma-glutamyltransferase E	Eukarya	Chordata	Mammalia	Primates	Hominidae	Homo	Homo sapiens	76.6	<1%	3	5	5	3	4	5	X
P05109	Protein S100-A8	Eukarya	Chordata	Mammalia	Primates	Hominidae	Homo	Homo sapiens	10.8	<1%	3	25	10	2	19	2	X
P81605	Dermcidin	Eukarya	Chordata	Mammalia	Primates	Hominidae	Homo	Homo sapiens	11.3	<1%	2	23	2	2	20	5	X
Q8N1N4	Keratin, type II cytoskeletal 78	Eukarya	Chordata	Mammalia	Primates	Hominidae	Homo	Homo sapiens	56.8	<1%	8	18	11	2	4	4	X
P02788	Lactotransferrin	Eukarya	Chordata	Mammalia	Primates	Hominidae	Homo	Homo sapiens	78.1	<1%	10	17	11	2	3	2	X
Q02413	Desmoglein-1	Eukarya	Chordata	Mammalia	Primates	Hominidae	Homo	Homo sapiens	113.7	<1%	10	13	15	2	3	2	X
Q6IG01	Keratin, type II cytoskeletal 1b	Eukarya	Chordata	Mammalia	Rodentia	Muridae	Rattus	Rattus norvegicus	57.2	<1%	9	12	140	2	4	16	X
P01877	Ig alpha-2 chain C region	Eukarya	Chordata	Mammalia	Primates	Hominidae	Homo	Homo sapiens	36.5	<1%	3	10	6	2	7	4	X
P59665	Neutrophil defensin 1	Eukarya	Chordata	Mammalia	Primates	Hominidae	Homo	Homo sapiens	10.2	<1%	1	10	1	2	19	3	X
P04040	Catalase	Eukarya	Chordata	Mammalia	Primates	Hominidae	Homo	Homo sapiens	59.7	<1%	2	5	2	2	5	2	X
Q6IFW8	Keratin, type I cytoskeletal 27	Eukarya	Chordata	Mammalia	Rodentia	Muridae	Rattus	Rattus norvegicus	49.1	<1%	2	4	54	2	4	86	X
P08835	Serum albumin	Eukarya	Chordata	Mammalia	Artiodactyla	Suidae	Sus	Sus scrofa	69.6	<1%	2	4	4	2	4	6	X
Q5XLE4	Serum albumin	Eukarya	Chordata	Mammalia	Perissodactyla	Equidae	Equus	Equus asinus	68.5	<1%	2	4	3	2	4	4	X
P02537	Keratin-3, type I cytoskeletal 51 kDa	Eukarya	Chordata	Amphibia	Anura	Pipidae	Xenopus	Xenopus laevis	51.9	<1%	2	3	9	2	3	3	X
P15476	Patatin-B1	Eukarya	Streptophyta		Solanales	Solanaceae	Solanum	Solanum tuberosum	42.6	<1%				2	5	2	X
P11426	Actin	Eukarya	Amoebozoa	Archamoebae	Mastigamoebida	Entamoebidae	Entamoeba	Entamoeba histolytica	42	<1%	2	6	6	1	3	2	X
P15357	Ubiquitin-40S ribosomal protein S27a	Eukarya	Arthropoda	Insecta	Diptera	Drosophilidae	Drosophila	Drosophila melanogaster	17.9	<1%	2	12	2	1	6	1	X
Q96VL0	Superoxide dismutase [Cu-Zn]	Eukarya	Ascomycota	Sordariomycetes	Hypocreales	Clavicipitaceae	Claviceps	Claviceps purpurea	15.8	<1%				1	6	31	X
Q5R9M3	Thioredoxin	Eukarya	Chordata	Mammalia	Primates	Hominidae	Pongo	Pongo abelii	11.9	<1%				1	8	4	X
Q96QA5	Gasdermin-A	Eukarya	Chordata	Mammalia	Primates	Hominidae	Homo	Homo sapiens	49.3	<1%				1	2	2	X
P05089	Arginase-1	Eukarya	Chordata	Mammalia	Primates	Hominidae	Homo	Homo sapiens	34.7	<1%				1	3	1	X
O75635	Serpin B7	Eukarya	Chordata	Mammalia	Primates	Hominidae	Homo	Homo sapiens	42.9	<1%				1	3	1	X
A5A6P2	Acid ceramidase	Eukarya	Chordata	Mammalia	Primates	Hominidae	Pan	Pan troglodytes	44.7	<1%				1	3	1	X
Q96P63	Serpin B12	Eukarya	Chordata	Mammalia	Primates	Hominidae	Homo	Homo sapiens	46.2	<1%				1	2	1	X
Q16610	Extracellular matrix protein 1	Eukarya	Chordata	Mammalia	Primates	Hominidae	Homo	Homo sapiens	60.6	<1%				1	2	1	X
P02787	Serotransferrin	Eukarya	Chordata	Mammalia	Primates	Hominidae	Homo	Homo sapiens	77	<1%				1	1	1	X
P01834	Ig kappa chain C region	Eukarya	Chordata	Mammalia	Primates	Hominidae	Homo	Homo sapiens	11.6	<1%	3	50	12	1	19	2	X
P01040	Cystatin-A	Eukarya	Chordata	Mammalia	Primates	Hominidae	Homo	Homo sapiens	11	<1%	3	48	5	1	12	1	X
P0CG05	Ig lambda-2 chain C regions	Eukarya	Chordata	Mammalia	Primates	Hominidae	Homo	Homo sapiens	11.3	<1%	3	47	4	1	9	2	X
A0A888	Prolactin-inducible protein homolog	Eukarya	Chordata	Mammalia	Primates	Hominidae	Pongo	Pongo pygmaeus	16.5	<1%	2	16	29	1	8	6	X
P01857	Ig gamma-1 chain C region	Eukarya	Chordata	Mammalia	Primates	Hominidae	Homo	Homo sapiens	36.1	<1%	4	15	5	1	4	2	X
P05090	Apolipoprotein D	Eukarya	Chordata	Mammalia	Primates	Hominidae	Homo	Homo sapiens	21.3	<1%	3	12	4	1	6	1	X
P01860	Ig gamma-3 chain C region	Eukarya	Chordata	Mammalia	Primates	Hominidae	Homo	Homo sapiens	41.3	<1%	3	11	4	1	4	2	X
Q02257	Junction plakoglobin	Eukarya	Chordata	Mammalia	Rodentia	Muridae	Mus	Mus musculus	81.7	<1%	6	11	7	1	2	1	X
Q5RC63	Peroxiredoxin-2	Eukarya	Chordata	Mammalia	Primates	Hominidae	Pongo	Pongo abelii	19.4	<1%	2	11	3	1	6	1	X
P03973	Antileukoproteinase	Eukarya	Chordata	Mammalia	Primates	Hominidae	Homo	Homo sapiens	14.3	<1%	1	9	1	1	9	1	X
P04745	Alpha-amylase 1	Eukarya	Chordata	Mammalia	Primates	Hominidae	Homo	Homo sapiens	57.7	<1%	4	8	5	1	3	1	X
P01591	Immunoglobulin J chain	Eukarya	Chordata	Mammalia	Primates	Hominidae	Homo	Homo sapiens	18.1	<1%	1	8	1	1	8	1	X
P29508	Serpin B3	Eukarya	Chordata	Mammalia	Primates	Hominidae	Homo	Homo sapiens	44.5	<1%	3	7	4	1	3	1	X
P48594	Serpin B4	Eukarya	Chordata	Mammalia	Primates	Hominidae	Homo	Homo sapiens	44.8	<1%	2	5	3	1	3	1	X
Q02383	Semenogelin-2	Eukarya	Chordata	Mammalia	Primates	Hominidae	Homo	Homo sapiens	65.4	<1%	1	4	2	1	4	3	X
P15924	Desmoplakin	Eukarya	Chordata	Mammalia	Primates	Hominidae	Homo	Homo sapiens	331.6	<1%	8	3	8	1	0	1	X
P00883	Fructose-bisphosphate aldolase A	Eukarya	Chordata	Mammalia	Lagomorpha	Leporidae	Oryctolagus	Oryctolagus cuniculus	39.3	<1%	1	3	1	1	3	1	X
P04075	Fructose-bisphosphate aldolase A	Eukarya	Chordata	Mammalia	Primates	Hominidae	Homo	Homo sapiens	39.4	<1%	1	3	1	1	3	1	X
B5DGM7	Fructose-bisphosphate aldolase A	Eukarya	Chordata	Actinopteri	Salmoniformes	Salmonidae	Salmo	Salmo salar	39.5	<1%	1	3	1	1	3	1	X
Q9Z2T6	Keratin, type II cuticular Hb5	Eukarya	Chordata	Mammalia	Rodentia	Muridae	Mus	Mus musculus	55.7	<1%	1	2	142	1	2	36	X
Q6UQ17	Phospholipid-transporting ATPase IK	Eukarya	Chordata	Mammalia	Rodentia	Muridae	Mus	Mus musculus	151.9	<1%	1	1	17	1	1	2	X
A9BP42	Probable protein kinase UbiB	Bacteria	Proteobacteria	Betaproteobacteria	Burkholderiales	Comamonadaceae	Delftia	Delftia acidovorans	60.3	<1%	1	2	2	1	2	3	X
Q41433	Probable serine protease inhibitor 6	Eukarya	Streptophyta		Solanales	Solanaceae	Solanum	Solanum tuberosum	24.1	<1%				1	6	2	X
Q3YJS9	Probable inactive patatin-3-Kuras 1	Eukarya	Streptophyta		Solanales	Solanaceae	Solanum	Solanum tuberosum	41.2	<1%				1	3	1	X
